# Supplementary material for: Nitrogen-functionalized carbon nanotube-supported bimetallic PtNi nanoparticles for hydrogen generation from hydrous hydrazine
Source: Royal Society of Chemistry journal article supplement (doi:10.1039/d1cc02794h), 2021-01-01
Supplement: d1cc02794h1.pdf [file d1cc02794h1.pdf]

# Nitrogen functional carbon nanotubes supported bimetallic PtNi nanoparticles for hydrogen generation from hydrous hydrazine

Xiaoping Hu<sup>a</sup>, Tong Liu<sup>b, \*</sup>, Xiaoli Zhang<sup>c</sup>, Jian Tian<sup>a, \*</sup>

<sup>a</sup> School of Materials Science and Engineering, Shandong University of Science and Technology, Qingdao 266590, China

<sup>b</sup> College of Materials Science and Engineering, Qingdao University of Science and Technology, Qingdao 266000, China

<sup>c</sup> School of Materials Science and Engineering, Zhengzhou University, Zhengzhou 450001, China

\* Corresponding authors. Email: liutong@qust.edu.cn (T. Liu), jiantian@sdust.edu.cn (J. Tian)

## 1. Materials

Hydrazine monohydrate ( $\text{H}_2\text{NNH}_2 \cdot \text{H}_2\text{O}$ , Aladdin reagent Co., Ltd, >98%), nickel(II) chloride hexahydrate ( $\text{NiCl}_2 \cdot 6\text{H}_2\text{O}$ , Sinopharm Chemical Reagent Co., Ltd, >98%), sodium borohydride ( $\text{NaBH}_4$ , Sinopharm Chemical Reagent Co., Ltd, >96%), potassium permanganate ( $\text{KMnO}_4$ , Sinopharm Chemical Reagent Co., Ltd,  $\geq 99.5\%$ ), graphite power (Sinopharm Chemical Reagent Co., Ltd,  $\geq 99.85\%$ ), hydrogen peroxide ( $\text{H}_2\text{O}_2$ , Sinopharm Chemical Reagent Co., Ltd,  $\geq 30\%$ ), phosphoric acid ( $\text{H}_3\text{PO}_4$ , Sinopharm Chemical Reagent Co., Ltd, AR), sulfuric acid ( $\text{H}_2\text{SO}_4$ , Sinopharm Chemical Reagent Co., Ltd, 95~98%), vulcanic-72 carbon (Cabot corporation,  $\geq 97\%$ ), multi-walled carbon nanotube (Shandong Dazhan nano materials Co., Ltd, 97%) were used without further purification. De-ionized water with a specific resistance of  $18.2 \text{ M}\Omega \cdot \text{cm}$  was obtained by reversed osmosis followed by ion exchange and filtration.

## 2. Synthesis of N-MWCNTs

1.0 g MWCNTs were mixed with 1.5 g urea, which was transferred to a ceramic crucible and heat treatment in a muffle furnace at 300 °C for two hours. (ACS Catal. 2017, 7, 2720–2724) After cooling to room temperature, the mixture was washed with DI water and ethanol for three times. The product was obtained after drying in an oven at 60 °C overnight. After that, 1.0 g as-prepared sample was mixed with 2.0 g urea again, and then heat-treated at 175 °C for 4 hours. The final N-MWCNTs samples were collected by centrifuging and washed with DI water three times and then dried in an oven at 60 °C.

### **3. Catalytic measurement:**

An aqueous suspension (4 mL) containing the as-prepared catalysts was placed in a two-neck round-bottom flask (30 mL), which was placed in a water bath under an ambient atmosphere. The reaction started when 2 mmol of hydrazine monohydrate was injected into the mixture using a syringe. A gas burette filled with water was connected to the reaction flask to measure the volume of released gas. The gas released during the reaction was measured volumetrically. The molar ratios of metal/N<sub>2</sub>H<sub>4</sub>•H<sub>2</sub>O were theoretically fixed at 0.025 for all the catalytic reactions.

### **4. Durability testing of the catalysts:**

For testing the durability of PtNi/N-MWCNTs catalysts, 2 mmol of N<sub>2</sub>H<sub>4</sub>•H<sub>2</sub>O was subsequently added into the reaction flask after the completion of the first-run decomposition of N<sub>2</sub>H<sub>4</sub>•H<sub>2</sub>O. Such test cycles of the catalyst for the decomposition of N<sub>2</sub>H<sub>4</sub>•H<sub>2</sub>O were carried out for 5 runs at 50 °C by adding N<sub>2</sub>H<sub>4</sub>•H<sub>2</sub>O.

### **5. Calculation of turnover frequency (TOF)**

The TOF reported here is an apparent TOF value based on the number of Ni and Pt atoms in the catalyst, which is calculated from the equation as follow:

$$\text{TOF} = 2P_0V / (3RTn_{NiPt}) \quad (1)$$

Where  $P_0$  is the atmospheric pressure (101325 Pa),  $V$  is the final generated volume of  $H_2/N_2$  gas,  $R$  is the universal gas constant ( $8.3145 \text{ m}^3 \text{ Pa mol}^{-1} \text{ K}^{-1}$ ),  $T$  is the room temperature (298 K),  $n_{NiPt}$  is the total mole number of Ni and Pt atoms in catalyst and  $t$  is the completion time of the reaction in hour.

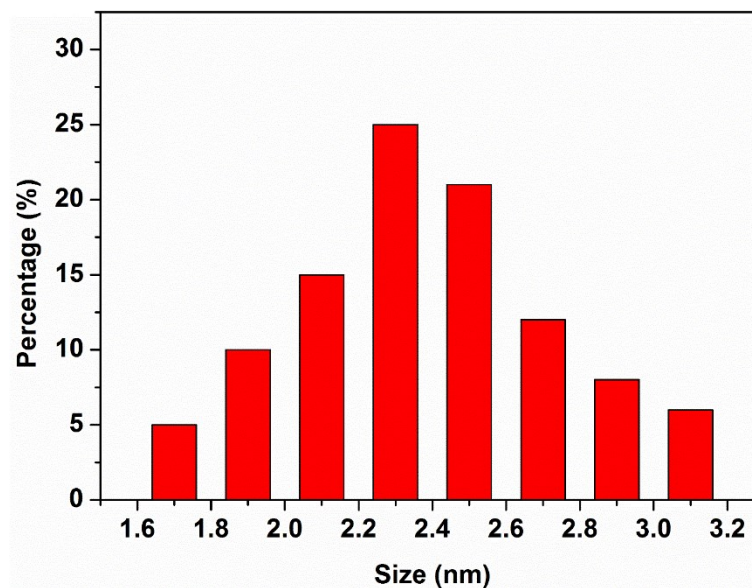

**Figure S1.** The particle size distribution of PtNi in PtNi/N-MWCNTs.

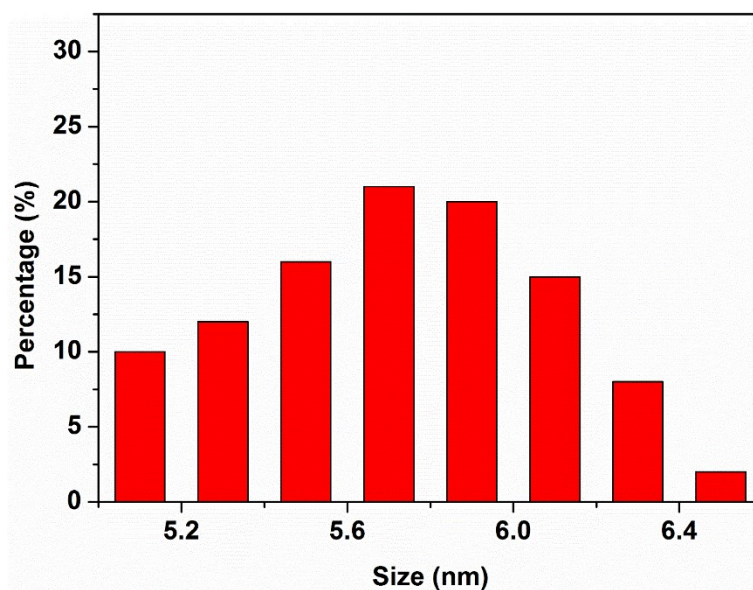

**Figure S2.** The particle size distribution of PtNi in PtNi/MWCNTs.

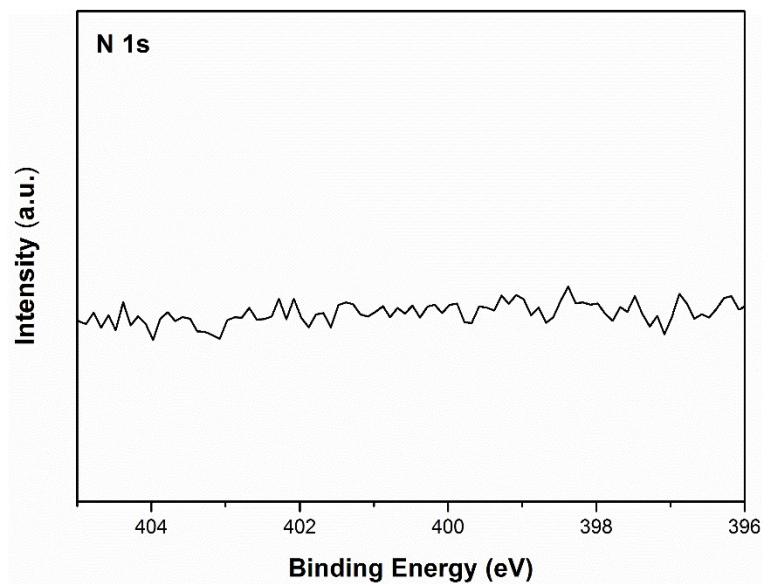

**Figure S3.** XPS spectrum of N 1s in PtNi/MWCNTs.

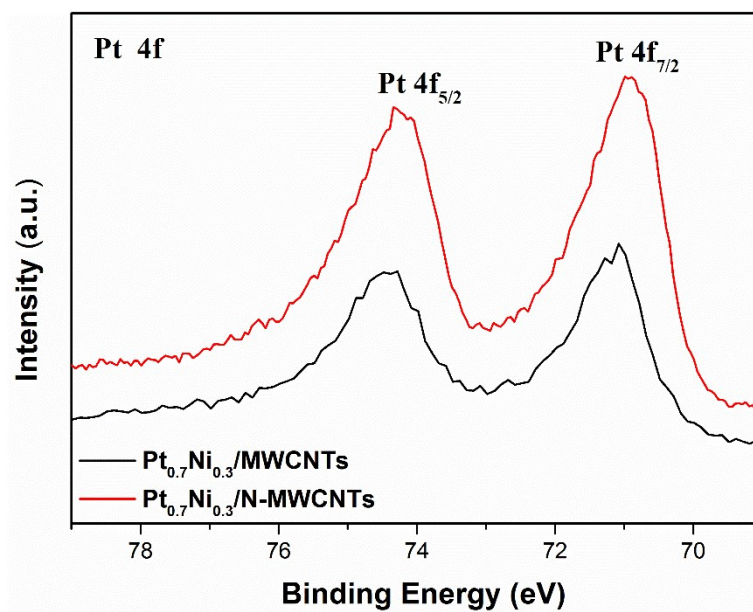

**Figure S4.** XPS spectrum of Pt 4f in PtNi/N-MWCNTs and PtNi/MWCNTs.

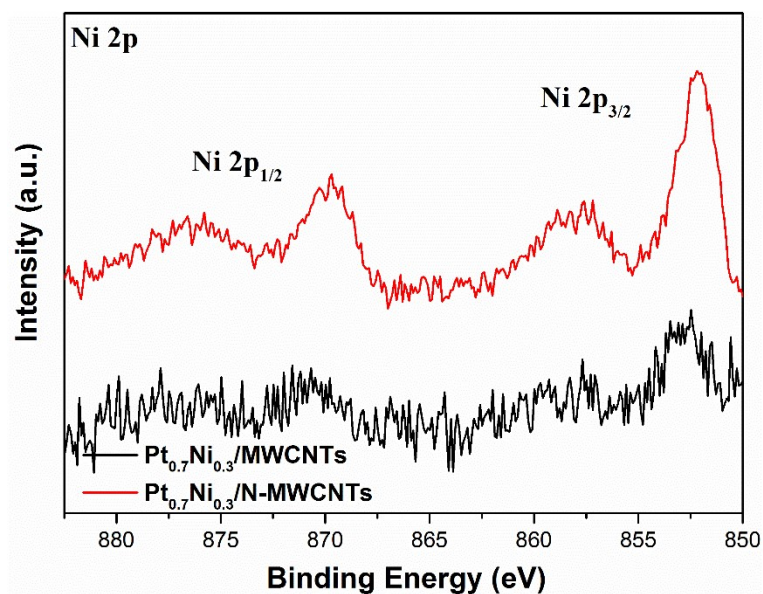

**Figure S5.** XPS spectrum of Ni 2p in PtNi/N-MWCNTs and PtNi/MWCNTs.

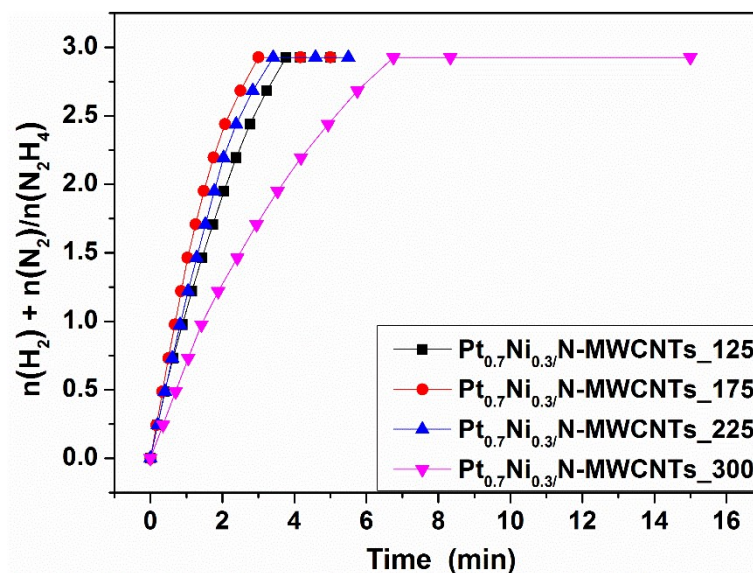

**Figure S6.** Time-course plots for the generated  $N_2+H_2$  from catalytic hydrazine decomposition over  $Pt_{0.7}Ni_{0.3}/N-MWCNTs$  nitridated different temperatures.

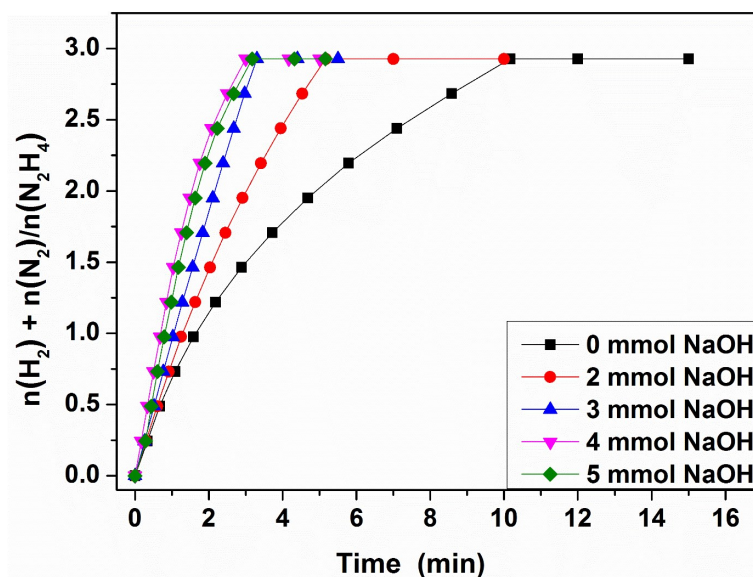

**Figure S7.** Time-course plots for the generated  $\text{N}_2+\text{H}_2$  from catalytic hydrazine decomposition over  $\text{Pt}_{0.7}\text{Ni}_{0.3}/\text{N-MWCNTs}$  in various NaOH amounts.

**Table S1** Catalytic activities of different catalysts for N<sub>2</sub>H<sub>4</sub>·H<sub>2</sub>O decomposition

| Catalyst                                                                                       | Solvent      | Temp. (°C) | Selectivity H <sub>2</sub> for (100 %) | TOF (h <sup>-1</sup> ) <sup>a</sup> | Ref.      |
|------------------------------------------------------------------------------------------------|--------------|------------|----------------------------------------|-------------------------------------|-----------|
| Pt <sub>0.7</sub> Ni <sub>0.3</sub> /N-MWCNTs                                                  | Aqueous NaOH | 50         | 100                                    | 1595                                | This work |
| Ni <sub>0.6</sub> Pt <sub>0.4</sub> /g-C <sub>3</sub> N <sub>4</sub> NPs                       | Aqueous NaOH | 50         | 100                                    | 2194 <sup>b</sup>                   | [1]       |
| Pt <sub>0.5</sub> Ni <sub>0.5</sub> /NGNs-850                                                  | Aqueous NaOH | 50         | 100                                    | 2116 <sup>b</sup>                   | [2]       |
| Ni <sub>0.4</sub> Pt <sub>0.6</sub> /CNTs                                                      | Aqueous NaOH | 50         | 100                                    | 1725 <sup>b</sup>                   | [3]       |
| Pt <sub>4</sub> Ni <sub>6</sub> /NC                                                            | Aqueous NaOH | 50         | 100                                    | 1602 <sup>b</sup>                   | [4]       |
| Rh <sub>55</sub> Ni <sub>45</sub> /Ce(OH)                                                      | Aqueous NaOH | 50         | 100                                    | 395 <sup>b</sup>                    | [5]       |
| Rh <sub>34</sub> Ni <sub>66</sub> @ZIF-8                                                       | Aqueous NaOH | 50         | 100                                    | 140                                 | [6]       |
| (Ni <sub>3</sub> Pt <sub>7</sub> ) <sub>0.5</sub> -(MnO <sub>x</sub> ) <sub>0.5</sub> /NPC-900 | Aqueous NaOH | 50         | 100                                    | 706 <sup>b</sup>                    | [7]       |
| Pt <sub>3</sub> Ni <sub>2</sub>                                                                | Aqueous NaOH | 50         | 100                                    | 290 <sup>b</sup>                    | [8]       |
| PtNi/CeO <sub>2</sub>                                                                          | Aqueous NaOH | 50         | 100                                    | 286 <sup>b</sup>                    | [9]       |
| Ni <sub>3</sub> Pt <sub>7</sub> /BNG-1000                                                      | Aqueous NaOH | 30         | 100                                    | 199.4                               | [10]      |
| Ni <sub>0.9</sub> Pt <sub>0.05</sub> Rh <sub>0.05</sub> /La <sub>2</sub> O <sub>3</sub>        | Aqueous NaOH | 25         | 100                                    | 45.9                                | [11]      |
| Ni <sub>0.9</sub> Pt <sub>0.1</sub> /Ce <sub>2</sub> O <sub>3</sub>                            | Aqueous NaOH | 25         | 100                                    | 28.1                                | [12]      |
| Ni <sub>0.58</sub> Pt <sub>0.42</sub> /graphene                                                | Aqueous NaOH | 30         | 100                                    | 434                                 | [13]      |
| Ni <sub>0.9</sub> Pt <sub>0.1</sub> /MIL-101                                                   | Aqueous NaOH | 30         | 100                                    | 140                                 | [14]      |
| Ni <sub>0.8</sub> Pt <sub>0.2</sub> /MIL-101-NH <sub>2</sub>                                   | Aqueous NaOH | 50         | 100                                    | 676                                 | [15]      |

<sup>a</sup> TOF values were calculated using the amount of released gas and the completion time of reaction in hour, <sup>b</sup> Initial TOF values were calculated at the initial stages of the catalytic reactions.



**Table S2** Elemental analyses for the samples

| Catalyst                                          | N content |
|---------------------------------------------------|-----------|
| Pt <sub>0.7</sub> Ni <sub>0.3</sub> /N-MWCNTs_125 | 2.72%     |
| Pt <sub>0.7</sub> Ni <sub>0.3</sub> /N-MWCNTs_175 | 3.25%     |
| Pt <sub>0.7</sub> Ni <sub>0.3</sub> /N-MWCNTs_225 | 4.59%     |
| Pt <sub>0.7</sub> Ni <sub>0.3</sub> /N-MWCNTs_300 | 9.28%     |

## Notes and references

- [1] C. Wan, L. Sun, L. Xu, D. Cheng, F. Chen, X. Zhan, Y. Yang, *J. Mater. Chem. A*, 7 (2019) 8798–8804.
- [2] A. Kumar, X. Yang, Q. Xu, *J. Mater. Chem. A*, 7 (2019) 112–115.
- [3] M. Zhang, L. Liu, S. Lu, L. Xu, Y. An, C. Wan, *ChemistrySelect* 4 (2019) 10494-10500.
- [4] Y. Qiu, Q. Shi, L. Zhou, M. Chen, C. Chen, P. Tang, G. Walker, P. Wang, *ACS Appl. Mater. Interfaces* 12 (2020) 18617–18624.
- [5] J. Chen, Q. Yao, J. Zhu, X. Chen, Z. H. Lu, *Int. J. Hydrogen Energ.* 41 (2016) 3946-3954.
- [6] B. Q. Xia, N. Cao, H. M. Dai, J. Su, X. J. Wu, W. Luo, G. Z. Cheng, *ChemCatChem* 6 (2014) 2549-2552.
- [7] B. Xia, T. Liu, W. Luo, G. Cheng, *J. Mater. Chem. A* 4 (2016) 5616-5622.
- [8] Y.-P. Qiu, L.-L. Zhou, Q. Shi, P. Wang, *Chem. Commun.* 57 (2021) 623-626.
- [9] H. Dai, Y. P. Qiu, H. B. Dai, P. Wang, *ACS Sustain. Chem. Eng.* 6 (2018) 9876-9882.
- [10] X. Du, C. Du, P. Cai, W. Luo, G. Cheng, *ChemCatChem* 8 (2016) 1410-1416.
- [11] O. Song-ll, J. M. Yan, H. L. Wang, Z. L. Wang, Q. Jiang, *Int. J. Hydrogen Energ.* 39 (2014) 3755-3761.
- [12] H. L. Wang, J. M. Yan, Z. L. Wang, O. Song-ll, Q. Jiang, *J. Mater. Chem. A* 1 (2013) 14957-14962.
- [13] J. M. Chen, Z.-H. Lu, W. Huang, Z. B. Kang, X. S. Chen, *J. Alloy. Compd.* 695 (2017) 3036-3043.
- [14] Z. J. Zhang, S. L. Zhang, Q. L. Yao, X. S. Chen, Z.-H. Lu, *Inorg. Chem.*, 56 (2017) 11938-11945.
- [15] P. Liu, X. Gu, Y. Wu, J. Cheng, H. Su, *Int. J. Hydrogen Energ.* 42 (2017) 19096-19105.
